# Supplementary material
Source: Springer Nature journal article supplement (https://www.springermedizin.de/resource/supplementary/13031_2010_54_MOESM3_ESM.pdf/9645000)

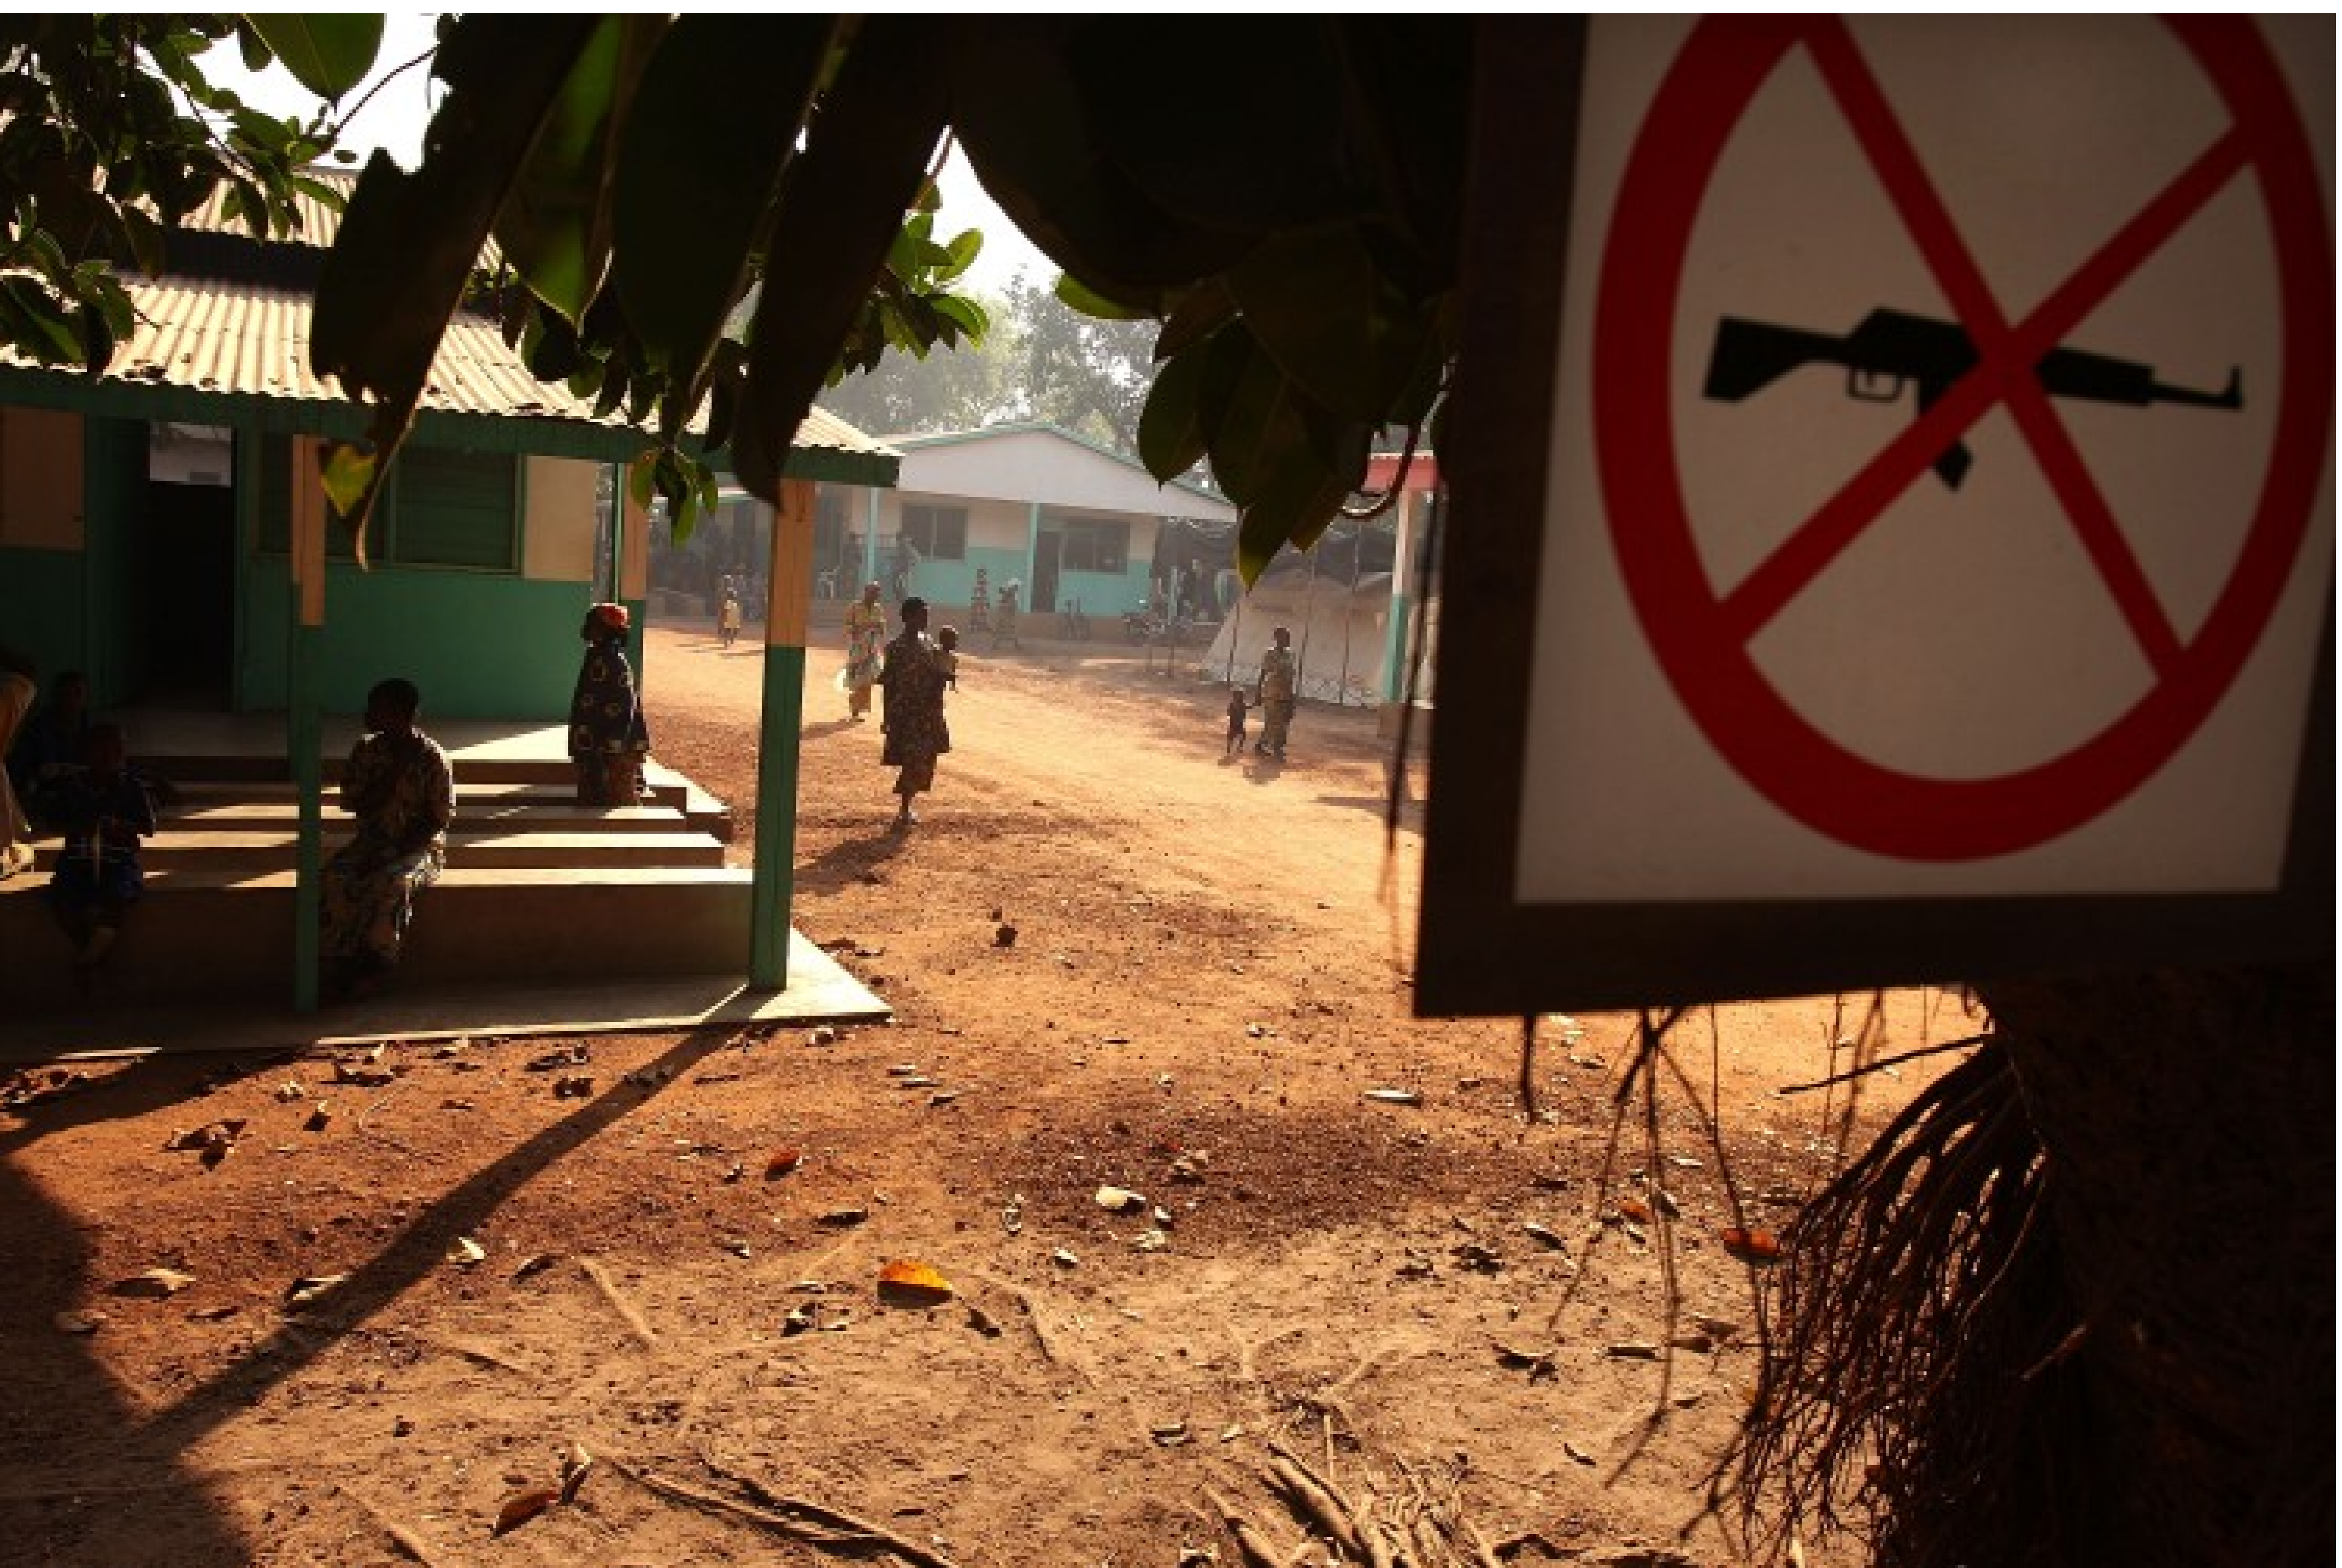

Supplement: MOESM3 [file 9645000]
